# Supplementary material
Source: PubMed Central journal article supplement (PMC5689477)
Supplement: NIHMS912871-supplement.pdf [file NIHMS912871-supplement.pdf]

## **Activation of IGF-1 Receptors/Akt signaling by systemic hyperinsulinemia contributes to cardiac hypertrophy but does not regulate cardiac autophagy in obese diabetic mice**

Karla Maria Pires, Marcio Buffolo, Christin Schaaf, J. David Symons, James Cox, E. Dale Abel, Craig H. Selzman and Sihem Boudina

### **Supplemental Material**

***Amino acids quantification.*** Frozen heart samples were digested in cold 90% methanol solution containing 1  $\mu\text{g}$  of d4-succinic acid. The samples were extracted using an Omni Bead Ruptor followed by incubation at  $-20^{\circ}\text{C}$  freezer for 1 hr. After incubation centrifuge the sample tubes at  $20,000 \times g$  for 10 minutes at  $4^{\circ}\text{C}$ . The supernatant was transferred from each sample tube into a labeled, fresh microcentrifuge tubes. Pooled quality control samples were made by removing 15% volume of collected supernatant from each sample. The samples were dried *en vacuo*.

***GC-MS analysis and data analysis.*** All GC-MS analysis was performed with a Waters GCT Premier mass spectrometer (Beverly, MA) fitted with an Agilent 6890 gas chromatograph (Santa Clara, CA) and a Gerstel MPS2 autosampler (Linthicum Heights, MD). Dried samples were suspended in 40  $\mu\text{L}$  of a 40 mg/mL O-methoxylamine hydrochloride (MP Biomedicals, Solon, OH) in pyridine (Thermo Fisher) and incubated for one hour at  $30^{\circ}\text{C}$ . To autosampler vials was added 25  $\mu\text{L}$  of this solution. 40  $\mu\text{L}$  of N-methyl-N-trimethylsilyltrifluoroacetamide (Thermo Fisher) was added automatically via the autosampler and incubated for 60 minutes at  $37^{\circ}\text{C}$  with shaking. After incubation 3  $\mu\text{L}$  of a fatty acid methyl ester standard (FAMES) solution was added via the autosampler then 1  $\mu\text{L}$  of the prepared sample was injected to the gas chromatograph inlet in the split mode with the inlet temperature held at  $250^{\circ}\text{C}$ . A 10:1 split ratio was used for analysis. The gas chromatograph had an initial temperature of  $95^{\circ}\text{C}$  for one minute followed by a  $40^{\circ}\text{C}/\text{min}$

ramp to 110°C and a hold time of 2 minutes. This was followed by a second 5°C/min ramp to 250°C, a third ramp to 350°C, then a final hold time of 3 minutes. A 30 m Phenomex ZB5-5 MSi column with a 5 m long guard column was employed for chromatographic separation. Helium was used as the carrier gas at 1 mL/min. Due to the high amounts of several metabolites the samples were analyzed once more at a 10-fold dilution. Data was collected using MassLynx 4.1 software (Waters). Metabolites were identified and their peak area was recorded using QuanLynx (Waters). This data was transferred to an Excel spread sheet (Microsoft, Redmond WA). Metabolite identity was established using a combination of an in house metabolite library developed using pure purchased standards and the commercially available NIST library.

**Western-blotting.** Total protein extraction was performed as previously described (1). Proteins were resolved by SDS-PAGE and electro-transferred to nitrocellulose, for high molecular weight proteins (>150kDa,) or PVDF, for low molecular weight proteins (<150kDa). The list of primary antibodies used is described in **Supplemental Table 1**. Protein detection was carried out with Alexa Fluor anti-rabbit 680 and anti-mouse 800 (LI-COR) as secondary antibodies, and fluorescence was quantified using the LI-COR Odyssey imager.

## Reference

(1) Belke, D.D., Betuing, S., Tuttle, M.J., Graveleau, C., Young, M.E., Pham, M., Zhang, D., Cooksey, R.C., McClain, D.A., Litwin, S.E., et al. 2002. Insulin signaling coordinately regulates cardiac size, metabolism, and contractile protein isoform expression. *J Clin Invest* 109:629-639.

## Supplemental Figure Legends

**Supplemental Figure 1. Impaired autophagic flux in the hearts of diet-induced obese (DIO) mice.** (A) Representative western-blot images of microtubule associated protein 1 light chain 3 (LC3) I and LC3II, p62/SQSTM1, autophagy related 3 (ATG3) and glyceraldehyde dehydrogenase (GAPDH) in whole heart homogenates from normal chow diet (NCD) and high fat diet (HFD) fed mice. NCD and HFD mice received an intra-peritoneal injection of saline or 50 mg/kg body weight chloroquine (CQ) for 4 hours before sacrifice. (B), (C), (D) and (E) The corresponding densitometry of LC3II/GAPDH, LC3-II/I ratios, p62/GAPDH and ATG3/GAPDH expressed as fold-change relative to NCD. Data are means  $\pm$  SEM. N=3-4 mice per group. \*  $P < 0.05$  versus NCD under the same treatment condition; #  $P < 0.05$  versus saline within the same diet.

**Supplemental Figure 2. Preserved cardiac autophagy in CIRKO mice.** (A) Representative western-blot images of LC3 I and LC3II, ATG3, p62/SQSTM1 and GAPDH in whole heart homogenates from wild-type and CIRKO mice. (B) The corresponding densitometry of LC3-II/I ratios, LC3I/GAPDH, LC3II/GAPDH, ATG3/GAPDH and p62/GAPDH expressed as fold-change relative to wild-type. Data are means  $\pm$  SEM. N=3 mice per group.

**Supplemental Figure 3.** Levels of amino acids in hearts of wild-type, cIGF-1R<sup>+/-</sup>, (*ob/ob*) and (*ob/ob*)/IGF-1R<sup>+/-</sup> mice. Data are means  $\pm$  SEM. N=4 mice per group.

**Supplemental Table 1: List of antibodies used**

| <i>Antibody</i>                          | <i>Source</i>  | <i>Dilution</i> |
|------------------------------------------|----------------|-----------------|
| Akt (pan)                                | Cell Signaling | 1:1000          |
| AMPK $\alpha$                            | Cell Signaling | 1:1000          |
| ATG3                                     | Sigma          | 1:1000          |
| ATG5/12                                  | Cell Signaling | 1:1000          |
| ATG7                                     | Cell Signaling | 1:1000          |
| GAPDH                                    | Cell Signaling | 1:1000          |
| IGF-I Receptor $\beta$                   | Cell Signaling | 1:1000          |
| LC3B                                     | Sigma          | 1:1000          |
| mTOR                                     | Cell Signaling | 1:1000          |
| Phospho-44/42 MAPK (Erk1/2)              | Cell Signaling | 1:1000          |
| P62/SQSTM1                               | Abcam          | 1:1000          |
| Phospho-70 S6 Kinase                     | Cell Signaling | 1:1000          |
| P90RSK (Ser359/363)                      | Cell Signaling | 1:1000          |
| Phospho-Akt (Ser473)                     | Cell Signaling | 1:1000          |
| Phospho-Akt (Thr308)                     | Cell Signaling | 1:1000          |
| Phospho-AMPK $\alpha$ (Thr172)           | Cell Signaling | 1:1000          |
| Phospho-IGF-I Receptor $\beta$ (Tyr1135) | Cell Signaling | 1:1000          |
| Phospho-mTOR (Ser2448)                   | Cell Signaling | 1:1000          |

|                                |                |        |
|--------------------------------|----------------|--------|
| Phospho-p44/42 MAPK (Erk1/2)   | Cell Signaling | 1:1000 |
| Phospho-p70 S6 Kinase (Thr389) | Cell Signaling | 1:1000 |
| Phospho-S6 (Ser235/236)        | Cell Signaling | 1:1000 |
| Phospho-ULK-1 (Ser757)         | Cell Signaling | 1:1000 |
| Rab 9                          | Cell Signaling | 1:1000 |
| RSK1/2/3                       | Cell Signaling | 1:1000 |
| S6                             | Cell Signaling | 1:1000 |
| ULK-1                          | Cell Signaling | 1:1000 |

---

**Supplemental Table 2: Ventricular parameters in wild-type and (*ob/ob*) mice treated with saline or chloroquine**

|            | <i>Wild-type</i> |                    | <i>(ob/ob)</i> |                    |
|------------|------------------|--------------------|----------------|--------------------|
|            | <i>Saline</i>    | <i>Chloroquine</i> | <i>Saline</i>  | <i>Chloroquine</i> |
|            | (n=5)            | (n=5)              | (n=5)          | (n=5)              |
| LVPWd (mm) | 0.67 ± 0.03      | 0.65 ± 0.03        | 0.71 ± 0.04    | 0.7 ± 0.05         |
| LVPWs (mm) | 0.9 ± 0.03       | 0.9 ± 0.03         | 1.1 ± 0.03*    | 1.2 ± 0.09*        |
| LVIDd (mm) | 3.8 ± 0.06       | 3.7 ± 0.07         | 3.7 ± 0.01     | 3.4 ± 0.1          |
| LVIDs (mm) | 2.6 ± 0.08       | 2.6 ± 0.07         | 2.5 ± 0.1      | 2.3 ± 0.07*#       |
| FS (%)     | 32.1 ± 1.1       | 30.6 ± 1.3         | 31 ± 2         | 30.5 ± 2.5         |

Values are mean ± SEM. \* p < 0.05 *versus* wild-type under the same treatment condition and # p < 0.05 *versus* saline within the same genotype. LVPWd: left ventricular posterior wall in diastole; LVPWs: left ventricular posterior wall in systole; LVIDd: left ventricular interior diameter in diastole LVIDs: left ventricular interior diameter in systole; FS: fractional shortening.

**Supplemental Table 3: Ventricular parameters in wild-type and (*ob/ob*) mice treated with DMSO or PD98059 (PD)**

|                  | <i>Wild-type</i> |                | <i>(ob/ob)</i> |                |
|------------------|------------------|----------------|----------------|----------------|
|                  | <i>DMSO</i>      | <i>PD</i>      | <i>DMSO</i>    | <i>PD</i>      |
|                  | ( <i>n</i> =5)   | ( <i>n</i> =5) | ( <i>n</i> =5) | ( <i>n</i> =5) |
| LVPWd (mm)       | 0.84 ± 0.05      | 0.87 ± 0.04    | 0.79 ± 0.04    | 0.8 ± 0.02     |
| LVPWs (mm)       | 0.92 ± 0.05      | 1.05 ± 0.05    | 0.95 ± 0.03    | 0.92 ± 0.04    |
| LVIDd (mm)       | 3.79 ± 0.05      | 3.7 ± 0.07     | 3.14 ± 0.2**   | 3.51 ± 0.07    |
| LVIDs (mm)       | 2.97 ± 0.06      | 2.89 ± 0.1     | 2.42 ± 0.16*   | 2.7 ± 0.07     |
| FS (%)           | 21.47 ± 1.5      | 21.29 ± 2.2    | 23.16 ± 0.52   | 22.93 ± 0.7    |
| Heart Rate (bpm) | 414.4 ± 17.1     | 437.4 ± 28.6   | 385.7 ± 17.3   | 403.9 ± 18.9   |

Values are mean ± SEM. \*  $p < 0.05$ ; \*\*  $p < 0.005$  versus wild-type under the same treatment condition. LVPWd: left ventricular posterior wall in diastole; LVPWs: left ventricular posterior wall in systole; LVIDd: left ventricular interior diameter in diastole LVIDs: left ventricular interior diameter in systole; FS: fractional shortening.
